# Supplementary material
Source: ML conference proceedings conference paper supplement (https://proceedings.mlr.press/v97/farina19a.html)
Supplement: Supplementary file [file farina19a-supp.pdf]

## A. Proofs

### A.1. Optimistic Follow-the-Regularized-Leader

We offer a proof of Theorem 8.

First, we introduce the following argmin-function:

$$\tilde{x} : \mathbf{L} \mapsto \operatorname{argmin}_{\mathbf{x} \in \mathcal{X}} \left\{ \langle \mathbf{x}, \mathbf{L} \rangle + \frac{1}{\eta} R(\mathbf{x}) \right\}. \quad (18)$$

Furthermore, let  $\mathbf{L}^t := \sum_{\tau=1}^t \ell^\tau$ . With this notation, the decisions produced by OFTRL, as defined in (8), can be expressed as  $\mathbf{x}^t = \tilde{x}(\mathbf{L}^{t-1} + \mathbf{m}^t)$ .

**Continuity of the argmin-function.** The first step in the proof is to study the continuity of the argmin-function  $\tilde{x}$ . Intuitively, the role of the regularizer  $R$  is to *smooth out* the linear objective function  $\langle \cdot, \mathbf{L} \rangle$ . So, it seems only reasonable to expect that, the higher the constant that multiplies  $R$ , the less the argmin  $\tilde{x}(\mathbf{L})$  is affected by small changes of  $\mathbf{L}$ . In fact, the following holds:

**Lemma 5.** *The argmin-function  $\tilde{x}$  is  $\eta$ -Lipschitz continuous with respect to the dual norm, that is*

$$\|\tilde{x}(\mathbf{L}) - \tilde{x}(\mathbf{L}')\| \leq \eta \|\mathbf{L} - \mathbf{L}'\|_*.$$

*Proof.* The variational inequality for the optimality of  $\tilde{x}(\mathbf{L})$  implies

$$\left\langle \mathbf{L} + \frac{1}{\eta} \nabla R(\tilde{x}(\mathbf{L})), \tilde{x}(\mathbf{L}') - \tilde{x}(\mathbf{L}) \right\rangle \geq 0. \quad (19)$$

Symmetrically for  $\tilde{x}(\mathbf{L}')$ , we find that

$$\left\langle \mathbf{L}' + \frac{1}{\eta} \nabla R(\tilde{x}(\mathbf{L}')), \tilde{x}(\mathbf{L}) - \tilde{x}(\mathbf{L}') \right\rangle \geq 0. \quad (20)$$

Summing inequalities 19 and 20, we obtain

$$\frac{1}{\eta} \langle \nabla R(\tilde{x}(\mathbf{L})) - \nabla R(\tilde{x}(\mathbf{L}')), \tilde{x}(\mathbf{L}) - \tilde{x}(\mathbf{L}') \rangle \leq \langle \mathbf{L}' - \mathbf{L}, \tilde{x}(\mathbf{L}) - \tilde{x}(\mathbf{L}') \rangle.$$

Using strong convexity of  $R(\cdot)$  on the left-hand side and the generalized Cauchy-Schwarz inequality on the right-hand side, we obtain

$$\frac{1}{\eta} \|\tilde{x}(\mathbf{L}) - \tilde{x}(\mathbf{L}')\|^2 \leq \|\tilde{x}(\mathbf{L}) - \tilde{x}(\mathbf{L}')\| \|\mathbf{L} - \mathbf{L}'\|_*,$$

and dividing by  $\|\tilde{x}(\mathbf{L}) - \tilde{x}(\mathbf{L}')\|$  we obtain the Lipschitz continuity of the argmin-function  $\tilde{x}$ .  $\square$

A direct consequence of Lemma 5 is the following corollary, which measures the stability (small step size) of the decisions output by OFTRL:

**Corollary 2.** *At each time  $t$ , the iterates produced by OFTRL satisfy  $\|\mathbf{x}^t - \mathbf{x}^{t-1}\| \leq 3\eta\Delta_\ell$ .*

*Proof.*

$$\begin{aligned} \|\mathbf{x}^t - \mathbf{x}^{t-1}\| &= \left\| \tilde{x}(\mathbf{L}^{t-1} + \mathbf{m}^t) - \tilde{x}(\mathbf{L}^{t-2} + \mathbf{m}^{t-1}) \right\| \\ &\leq \eta \|\ell^{t-1} + \mathbf{m}^t - \mathbf{m}^{t-1}\|_* \leq 3\eta\Delta_\ell, \end{aligned}$$

where the first inequality holds by Lemma 5 and the second one by definition of  $\Delta_\ell$  and the triangle inequality.  $\square$

The rest of the proof, specifically the predictivity parameters  $\alpha$  and  $\beta$  of OFTRL follow directly from the proof of Theorem 19 in the appendix of Syrgkanis et al. (2015).

## A.2. Regret Bounds

**Lemma 1.** For all  $k \in \mathcal{K}$ ,  $R_k^{\Delta, T} = \sum_{j \in \mathcal{C}_k} R_j^{\Delta, T}$ .

*Proof.* By definition of  $R_k^{\Delta, T}$ ,

$$R_k^{\Delta, T} = \sum_{t=1}^T \langle \ell_k^{\Delta, t}, \mathbf{x}_k^{\Delta, t} \rangle - \min_{\tilde{\mathbf{x}}_k^{\Delta} \in X_k^{\Delta}} \sum_{t=1}^T \langle \ell_k^{\Delta, t}, \tilde{\mathbf{x}}_k^{\Delta} \rangle.$$

By using (12) and (11), we can break the dot products and the minimization problem into independent parts, one for each  $j \in \mathcal{C}_k$ :

$$\begin{aligned} R_k^{\Delta, T} &= \sum_{j \in \mathcal{C}_k} \sum_{t=1}^T \langle \ell_j^{\Delta, t}, \mathbf{x}_j^{\Delta, t} \rangle - \sum_{j \in \mathcal{C}_k} \min_{\tilde{\mathbf{x}}_j^{\Delta} \in X_j^{\Delta}} \sum_{t=1}^T \langle \ell_j^{\Delta, t}, \tilde{\mathbf{x}}_j^{\Delta} \rangle \\ &= \sum_{j \in \mathcal{C}_k} \left( \sum_{t=1}^T \langle \ell_j^{\Delta, t}, \mathbf{x}_j^{\Delta, t} \rangle - \min_{\tilde{\mathbf{x}}_j^{\Delta} \in X_j^{\Delta}} \sum_{t=1}^T \langle \ell_j^{\Delta, t}, \tilde{\mathbf{x}}_j^{\Delta} \rangle \right) \\ &= \sum_{j \in \mathcal{C}_k} R_j^{\Delta, T}, \end{aligned}$$

as we wanted to show.  $\square$

**Lemma 2.** For all  $j \in \mathcal{J}$ ,  $R_j^{\Delta, T} \leq \hat{R}_j^T + \max_{k \in \mathcal{C}_j} R_k^{\Delta, T}$ .

*Proof.* By definition of  $R_j^{\Delta, T}$ ,

$$R_j^{\Delta, T} = \sum_{t=1}^T \langle \ell_j^{\Delta, t}, \mathbf{x}_j^{\Delta, t} \rangle - \min_{\tilde{\mathbf{x}}_j^{\Delta} \in X_j^{\Delta}} \sum_{t=1}^T \langle \ell_j^{\Delta, t}, \tilde{\mathbf{x}}_j^{\Delta} \rangle.$$

By combining (13) and (11), we can break the dot products and the minimization problem into independent parts, one for each  $k \in \mathcal{C}_j$ , as well as a part that depends solely on  $\tilde{\mathbf{x}}_j$ :

$$\begin{aligned} R_j^{\Delta, T} &= \sum_{t=1}^T \left( \langle [\ell_j^{\Delta, t}]_j, \tilde{\mathbf{x}}_j^t \rangle + \sum_{\substack{a \in A_j \\ k = \rho(j, a)}} \tilde{\mathbf{x}}_{ja}^t \langle \ell_k^{\Delta, t}, \mathbf{x}_k^{\Delta, t} \rangle \right) \\ &\quad - \min_{\tilde{\mathbf{x}}_j \in \Delta^{n_j}} \left\{ \left( \sum_{t=1}^T \langle [\ell_j^{\Delta, t}]_j, \tilde{\mathbf{x}}_j \rangle \right) + \sum_{\substack{a \in A_j \\ k = \rho(j, a)}} \tilde{\mathbf{x}}_{ja} \left( \min_{\tilde{\mathbf{x}}_k^{\Delta} \in X_k^{\Delta}} \sum_{t=1}^T \langle \ell_k^{\Delta, t}, \tilde{\mathbf{x}}_k^{\Delta} \rangle \right) \right\} \\ &= \sum_{t=1}^T \left( \langle [\ell_j^{\Delta, t}]_j, \tilde{\mathbf{x}}_j^t \rangle + \sum_{\substack{a \in A_j \\ k = \rho(j, a)}} \tilde{\mathbf{x}}_{ja}^t \langle \ell_k^{\Delta, t}, \mathbf{x}_k^{\Delta, t} \rangle \right) \\ &\quad - \min_{\tilde{\mathbf{x}}_j \in \Delta^{n_j}} \left\{ \left( \sum_{t=1}^T \langle [\ell_j^{\Delta, t}]_j, \tilde{\mathbf{x}}_j \rangle \right) + \sum_{\substack{a \in A_j \\ k = \rho(j, a)}} \tilde{\mathbf{x}}_{ja} \left( -R_k^{\Delta, T} + \sum_{t=1}^T \langle \ell_k^{\Delta, t}, \mathbf{x}_k^{\Delta, t} \rangle \right) \right\} \end{aligned}$$

$$\leq \sum_{t=1}^T \left( \langle [\ell_j^{\Delta,t}]_j, \hat{\mathbf{x}}_j^t \rangle + \sum_{\substack{a \in A_j \\ k=\rho(j,a)}} \hat{\mathbf{x}}_{ja}^t \langle \ell_k^{\Delta,t}, \mathbf{x}_k^{\Delta,t} \rangle \right) \\ - \min_{\tilde{\mathbf{x}}_j \in \Delta^{n_j}} \left\{ \sum_{t=1}^T \left( \langle [\ell_j^{\Delta,t}]_j, \tilde{\mathbf{x}}_j \rangle + \sum_{\substack{a \in A_j \\ k=\rho(j,a)}} \tilde{\mathbf{x}}_{ja} \langle \ell_k^{\Delta,t}, \mathbf{x}_k^{\Delta,t} \rangle \right) \right\} + \max_{\tilde{\mathbf{x}}_j \in \Delta^{n_j}} \sum_{a \in A_j} \tilde{\mathbf{x}}_{ja} R_k^{\Delta,T},$$

where the equality follows by the definition of  $R_k^{\Delta,T}$ , and the inequality follows from breaking the minimization of a sum into a sum of minimization problems. By identifying the difference between the first two terms as the counterfactual regret  $\hat{R}_j^T$  (that is, the regret of  $\hat{\mathcal{R}}_j$  up to time  $T$ ), we obtain

$$R_j^{\Delta,T} \leq \hat{R}_j^T + \max_{\tilde{\mathbf{x}}_j \in \Delta^{n_j}} \sum_{k \in \mathcal{C}_j} \tilde{\mathbf{x}}_{ja} R_k^{\Delta,T} = \hat{R}_j^T + \max_{k \in \mathcal{C}_j} R_k^{\Delta,T},$$

as we wanted to show.  $\square$

### A.3. Stable-Predictive Regret Minimizer

We will prove both Lemma 3 and Lemma 4 with respect to the 2-norm. This does not come at the cost of generality, since all norms are equivalent on finite-dimensional vector spaces, that is, for every choice of norm  $\|\cdot\|$ , there exist constants  $m, M > 0$  such that for all  $\mathbf{x}$ ,  $m\|\mathbf{x}\| \leq \|\mathbf{x}\|_2 \leq M\|\mathbf{x}\|$ .

**Lemma 3.** *Let  $k \in \mathcal{K}$  be an observation node, and assume that  $\mathcal{R}_j^{\Delta}$  is a  $(\gamma_j, O(1), O(1))$ -stable-predictive regret minimizer over the sequence-form strategy space  $X_j^{\Delta}$  for each  $j \in \mathcal{C}_k$ . Then,  $\mathcal{R}_k^{\Delta}$  is a  $(\gamma_k, O(1), O(1))$ -stable-predictive regret minimizer over the sequence-form strategy space  $X_k^{\Delta}$ .*

*Proof.* By hypothesis, for all  $j \in \mathcal{C}_k$  we have

$$R_j^{\Delta,T} \leq \frac{O(1)}{\gamma_j} + O(1)\gamma_j \sum_{t=1}^T \|\ell_j^{\Delta,t} - \mathbf{m}_j^{\Delta,t}\|_2^2 \quad (21)$$

and

$$\|\mathbf{x}_j^{\Delta,t} - \mathbf{x}_j^{\Delta,t-1}\|_2 \leq \gamma_j, \quad (22)$$

where  $\mathbf{x}_j^{\Delta,t}$  is the decision output by  $\mathcal{R}_j^{\Delta}$  at time  $t$ .

Substituting (21) into the regret bound of Lemma 1:

$$R_k^{\Delta,T} \leq O(1) \sum_{j \in \mathcal{C}_k} \frac{1}{\gamma_j} + O(1) \sum_{j \in \mathcal{C}_k} \sum_{t=1}^T \gamma_j \|\ell_j^{\Delta,t} - \mathbf{m}_j^{\Delta,t}\|_2^2 \\ \leq O(1) \frac{n_k^{3/2}}{\gamma_k} + O(1) \frac{\gamma_k}{\sqrt{n_k}} \sum_{t=1}^T \sum_{j \in \mathcal{C}_k} \|\ell_j^{\Delta,t} - \mathbf{m}_j^{\Delta,t}\|_2^2 \\ = \frac{O(1)}{\gamma_k} + O(1)\gamma_k \sum_{t=1}^T \|\ell_k^{\Delta,t} - \mathbf{m}_k^{\Delta,t}\|_2^2 \quad (23)$$

where the second inequality comes from substituting the value  $\gamma_j = \gamma_k/\sqrt{n_k}$  as per (14), and the equality comes from the fact that the  $\ell_j^{\Delta,t}$  and  $\mathbf{m}_j^{\Delta,t}$  form a partition of the vectors  $\ell_k^{\Delta,t}$  and  $\mathbf{m}_k^{\Delta,t}$ , respectively.

We now analyze the stability properties of  $\mathcal{R}_k^{\Delta}$ :

$$\|\mathbf{x}_k^{\Delta,t} - \mathbf{x}_k^{\Delta,t-1}\|_2 = \sqrt{\sum_{j \in \mathcal{C}_k} \|\mathbf{x}_j^{\Delta,t} - \mathbf{x}_j^{\Delta,t-1}\|_2^2} \leq \sqrt{\sum_{j \in \mathcal{C}_k} \gamma_j^2} = \gamma_k,$$

where the first equality follows from (1), the inequality holds by (22) and the second equality holds by substituting the value  $\gamma_j = \gamma_k/\sqrt{n_k}$  as per (14). This shows that  $\mathcal{R}_k^{\Delta}$  is  $\gamma_k$ -stable. Combining this with the predictivity bound (23) above, we obtain the claim.  $\square$

**Lemma 4.** Let  $j \in \mathcal{J}$  be a decision node, and assume that  $\mathcal{R}_k^\Delta$  is a  $(\gamma_k, O(1), O(1))$ -stable-predictive regret minimizer over the sequence-form strategy space  $X_k^\Delta$  for each  $k \in \mathcal{C}_j$ . Suppose further that  $\hat{\mathcal{R}}_j$  is a  $(\kappa_j, O(1), O(1))$ -stable-predictive regret minimizer over the simplex  $\Delta^{n_j}$ . Then,  $\mathcal{R}_j^\Delta$  is a  $(\gamma_j, O(1), O(1))$ -stable-predictive regret minimizer over the sequence-form strategy space  $X_j^\Delta$ .

*Proof.* By hypothesis, for all  $k \in \mathcal{C}_j$  we have

$$R_k^{\Delta, T} \leq \frac{O(1)}{\gamma_k} + O(1)\gamma_k \sum_{t=1}^T \|\ell_k^{\Delta, t} - \mathbf{m}_k^{\Delta, t}\|_2^2 \quad (24)$$

and

$$\|\mathbf{x}_k^{\Delta, t} - \mathbf{x}_k^{\Delta, t-1}\|_2 \leq \gamma_k. \quad (25)$$

We substitute (24) into the regret bound of Lemma 2. The key observation is that the loss vector—and their predictions—entering the subtree rooted at  $k$  ( $k \in \mathcal{C}_j$ ) are simply forwarded from  $j$ ; with this, we obtain:

$$R_{\Delta_j}^T \leq \hat{R}_j^T + \frac{O(1)}{\gamma_k} + O(1)\gamma_k \sum_{t=1}^T \|\ell_j^{\Delta, t} - \mathbf{m}_j^{\Delta, t}\|_2^2. \quad (26)$$

On the other hand, by hypothesis  $\hat{\mathcal{R}}_j$  is a  $(\kappa_j, O(1), O(1))$ -stable-predictive regret minimizer. Hence,

$$\begin{aligned} \hat{R}_j^T &\leq \frac{O(1)}{\kappa_j} + O(1)\kappa_j \sum_{t=1}^T \|\hat{\ell}_j^t - \hat{\mathbf{m}}_j^t\|_2^2 \\ &= \frac{O(1)}{\gamma_j} + O(1)\gamma_j \sum_{t=1}^T \|\ell_j^{\Delta, t} - \mathbf{m}_j^{\Delta, t}\|_2^2, \end{aligned} \quad (27)$$

where the equality comes from the definition of  $\kappa_j$  (Equation (15)) and the fact that

$$\begin{aligned} \|\hat{\ell}_j^t - \hat{\mathbf{m}}_j^t\|_2^2 &\leq \sum_{k \in \mathcal{C}_j} \|\mathbf{x}_k^{\Delta, t}\|_2^2 \cdot \|\ell_k^{\Delta, t} - \mathbf{m}_k^{\Delta, t}\|_2^2 \\ &\leq \|\ell_j^{\Delta, t} - \mathbf{m}_j^{\Delta, t}\|_2^2 \sum_{k \in \mathcal{C}_j} B_k^2 \\ &= O(1)\|\ell_j^{\Delta, t} - \mathbf{m}_j^{\Delta, t}\|_2^2. \end{aligned}$$

By substituting (27) into (26) and noting that  $\gamma_k = O(1)\gamma_j$ , we obtain

$$R_j^{\Delta, T} \leq \frac{O(1)}{\gamma_j} + O(1)\gamma_j \sum_{t=1}^T \|\ell_j^{\Delta, t} - \mathbf{m}_j^{\Delta, t}\|_2^2,$$

which establishes the predictivity of  $\mathcal{R}_j^\Delta$ .

To conclude the proof, we show that  $\mathcal{R}_j^\Delta$  has stability parameter  $\gamma_j$ . To this end, note that by (2)

$$\begin{aligned} \|\mathbf{x}_j^{\Delta, t} - \mathbf{x}_j^{\Delta, t-1}\|_2^2 &= \left\| \left( \sum_{a \in A_j} \hat{\mathbf{x}}_{ja}^t \mathbf{x}_{ja}^{\Delta, t} \right) - \left( \sum_{a \in A_j} \hat{\mathbf{x}}_{ja}^{t-1} \mathbf{x}_{ja}^{\Delta, t-1} \right) \right\|_2^2 + \|\hat{\mathbf{x}}_j^t - \hat{\mathbf{x}}_j^{t-1}\|_2^2 \\ &\leq \|\hat{\mathbf{x}}_j^t - \hat{\mathbf{x}}_j^{t-1}\|_2^2 \left( 1 + 2 \sum_{k \in \mathcal{C}_j} \|\mathbf{x}_k^{\Delta, t}\|_2^2 \right) + 2 \sum_{k \in \mathcal{C}_k} \|\mathbf{x}_k^{\Delta, t} - \mathbf{x}_k^{\Delta, t-1}\|_2^2 \\ &\leq 2n_j B_j^2 \|\hat{\mathbf{x}}_j^t - \hat{\mathbf{x}}_j^{t-1}\|_2^2 + 2 \sum_{k \in \mathcal{C}_k} \|\mathbf{x}_k^{\Delta, t} - \mathbf{x}_k^{\Delta, t-1}\|_2^2, \end{aligned}$$

where we have used the Cauchy-Schwarz inequality and the definition of  $B_j$  (Equation 16). By using the stability of  $\hat{\mathcal{R}}_j$ , that is  $\|\hat{\mathbf{x}}_j^t - \hat{\mathbf{x}}_j^{t-1}\|_2^2 \leq \kappa_j^2 = \gamma_j^2 / (4n_j B_j^2)$ , as well as the hypothesis (25) and (14):

$$\|\mathbf{x}_j^{\Delta, t} - \mathbf{x}_j^{\Delta, t-1}\|_2 \leq \frac{\gamma_j^2}{2} + 2 \sum_{k \in \mathcal{C}_j} \left( \frac{\gamma_j}{2\sqrt{n_j}} \right)^2 = \frac{\gamma_j^2}{2} + 2n_j \left( \frac{\gamma_j}{2\sqrt{n_j}} \right)^2 = \gamma_j^2.$$

Hence,  $\mathcal{R}_j^\Delta$  has stability parameter  $\gamma_j$  as we wanted to show.  $\square$

## B. Experiments

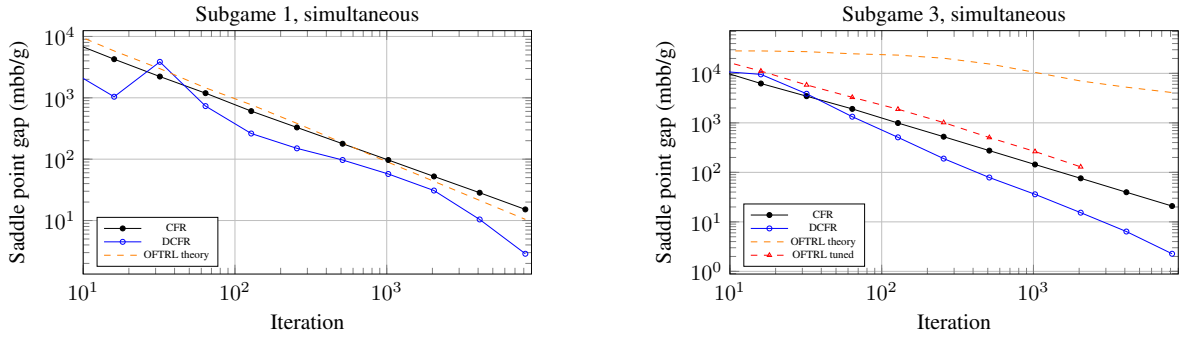

Figure 4. Convergence rate with iterations on the x-axis, and the exploitability in mbb. All algorithms use simultaneous updates.

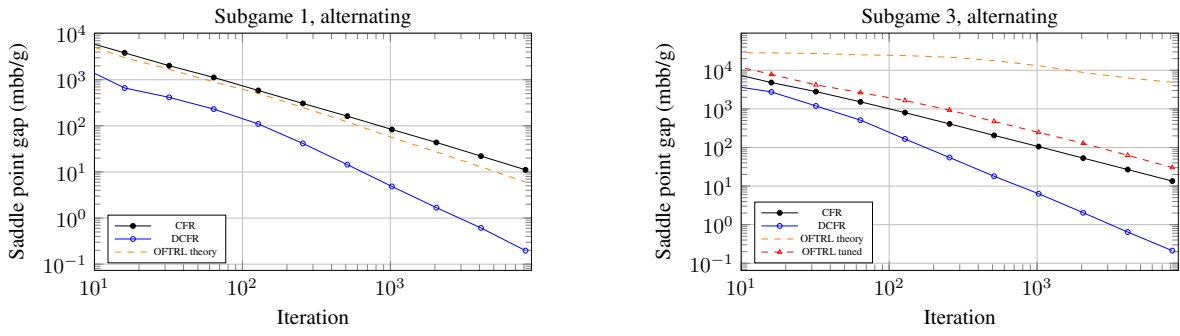

Figure 5. Convergence rate with iterations on the x-axis, and the exploitability in mbb. All algorithms use alternating updates.
